# Supplementary material
Source: PubMed Central journal article supplement (PMC5570515)

## Supplementary Materials

### Statistical Model

A Bayesian multiple rater model was used to assess concordance of ordinal data across multiple raters. The ordinal score was treated as a latent trait and was modeled with normal distribution, with the latent variables indicating an unmeasured continuous measure of polyposis severity. In particular, define a latent variable  $\alpha_i$  that indicates the true polyposis severity score for video  $i$ . We assume that rater  $j$ 's perception of polyp severity is given by  $t_{ij}$ , which differs from the true latent polyposis severity score by  $\varepsilon_{ij}$ . Thus, the rater  $j$  perceived latent trait is given by the model  $t_{ij} = \alpha_i + \varepsilon_{ij}$  where  $\varepsilon_{ij} \sim N(0, \sigma_\varepsilon^2)$  represents the rater-to-rater variability. We assume that the  $\alpha_i$  are independently distributed normal random variables with variance  $\sigma_\alpha^2$ ,  $N(0, \sigma_\alpha^2)$ , with  $\sigma_\alpha^2$  indicating the video-to-video variability. Thus, we can define a measure of rater agreement using  $\rho = \sigma_\alpha^2 / (\sigma_\alpha^2 + \sigma_\varepsilon^2)$ , which is also called the intraclass correlation coefficient (ICC). The measure  $\rho$  indicates the proportion of total variability attributed to the video-to-video component, and is constrained between 0 and 1. Thus, higher  $\rho$  indicates greater concordance, with  $\rho=1$  indicating all raters gave the exact same rating to all videos, and  $\rho=0.5$  indicating the variability across raters being equal in magnitude to the variability across videos.

In the latent model, for a score with five grades, a total of four grade cutoffs must be introduced that link the latent continuous score to the observed ordinal stages. Because the response categories are ordered, we must impose a constraint on the values of grade cutoffs. Given a rater, the ordering constraint may be stated mathematically as  $-\infty < \gamma_1 \leq \gamma_2 \leq \gamma_3 \leq \gamma_4 \leq \infty$  ( $\gamma_5$ ). When  $t_{ij}$  falls between the grade interval  $(\gamma_{c-1}, \gamma_c]$ , the observation is classified in to category  $c$ . The prior distributions were specified as follows:  $\sigma_\varepsilon^2$  has an inverse-gamma prior, i.e.,  $1/\sigma_\varepsilon^2 \sim \text{Gamma}(1, 1)$ , and the category cutoffs  $\gamma_c$  are given independent uniform priors.

The posterior distributions of  $(\sigma_\alpha^2, \sigma_\varepsilon^2, \gamma_c)$  were obtained using the MCMC algorithm. The concordance measure  $\rho$  for each posterior sample was calculated from  $\sigma_\alpha^2$  divided by  $\sigma_\alpha^2 + \sigma_\varepsilon^2$ , from which the posterior mean and 95% posterior credible intervals were computed.

Concordant measures should have  $\rho > 0.50$  at a minimum, since  $\rho \leq 0.5$  suggests that the rater-to-rater variability is of greater magnitude than the video-to-video variability. Thus, as a measure of statistical significance, we computed  $p = \text{Prob}(\rho \leq 0.50 | \text{data})$  as a measure of statistical significance, with  $p < 0.05$  indicating the level of agreement is significantly greater than this.

### Simulation study

We performed a simulation study in order to determine the necessary sample size to have power to detect a significantly strong concordance of  $\rho = 0.70$  and assess the study's operating characteristics under other possible concordances. To simulate data for the studies, we generated multiple data sets based on the different values of  $\sigma_\alpha^2$  and  $\sigma_\varepsilon^2$  as follows:

- ICC = 0.5 implies  $\sigma_\varepsilon^2 = \sigma_\alpha^2$ : the rater variation is the same as video variation
- ICC = 0.67 implies  $\sigma_\varepsilon^2 = \sigma_\alpha^2/2$ : the rater variation is 1/2 of video variation
- ICC = 0.75 implies  $\sigma_\varepsilon^2 = \sigma_\alpha^2/3$ : the rater variation is 1/3 of video variation
- ICC = 0.80 implies  $\sigma_\varepsilon^2 = \sigma_\alpha^2/4$ : the rater variation is 1/4 of video variation

The procedure of the simulation study can be summarized as follows:

1. Specify J (number of raters) and I (number of videos)
2. Specify a distribution of proportions of each component in the ordered score  $p_c$  ( $c = 1, 2, 3, 4, 5$ )
3. Given a rater and the distribution of  $p_c$ , obtain four cutoffs  $\gamma_c$  from Dirichlet distribution  $\text{Dir}(5, p_c)$

4. Generate latent trait  $t_{ij} = \alpha_i + \varepsilon_{ij}$  as follows:
  - i. generate  $\alpha_i$  from normal distribution  $N(0, \sigma_\alpha^2)$  where  $i = 1, \dots, I$
  - ii. given  $\alpha_i$ , generate  $\varepsilon_{ij}$  from normal distribution  $N(0, \sigma_\varepsilon^2)$  where  $j = 1, \dots, J$
5. Obtain the 5-point ordered score by categorizing  $t_{ij}$  using the cutoffs  $\gamma_c^j$  from Step 3
6. Estimate the posterior distribution of  $\rho$  using the MCMC algorithm [1, 2]
7. Claim a significant agreement if  $\text{Prob}(\rho \leq 0.5 | \text{data}) < p_L$ , where  $p_L$  is disagreement parameter and should be set low such as 0.05 or 0.1.

Table 1 summarizes our simulation result with five different scenarios of ICC based on 24 raters and 24 videos from 100 simulated trials, assuming the distribution of ordered scores  $p_c$  are 0.30, 0.25, 0.20, 0.15, and 0.10, respectively. The simulation results showed that, a sample size of 24 raters and 24 videos will have at least 83% power for a concordance of ICC=0.70 based on this Bayesian multiple-rater modeling. More scenarios with 12 or 18 raters are shown in Table 2.

Supplemental Table 1: Power estimation based on number of raters ( $J=24$ ) and number of videos ( $I = 24$ ) from 100 simulated trials, assuming the distribution of ordered scores  $p_c$  are 0.30, 0.25, 0.20, 0.15, and 0.10, respectively. We claimed a significant agreement if  $\text{Prob}(\rho \leq 0.5 | \text{data}) < p_L$ :

| <b>Scenarios</b> | <b><math>p_L=0.05</math></b> | <b><math>p_L=0.10</math></b> | <b><math>p_L=0.20</math></b> |
|------------------|------------------------------|------------------------------|------------------------------|
| $\rho = 0.50$    | 0.04                         | 0.05                         | 0.07                         |
| $\rho = 0.67$    | 0.69                         | 0.74                         | 0.78                         |
| $\rho = 0.70$    | 0.83                         | 0.88                         | 0.90                         |
| $\rho = 0.75$    | 0.87                         | 0.91                         | 0.93                         |
| $\rho = 0.80$    | 0.99                         | 0.99                         | 1.0                          |

Supplemental Table 2: Power estimation based on number of raters ( $J = 12$  or  $18$ ) and number of videos ( $I = 20, 30$  or  $40$ ) from 100 simulated trials, assuming the distribution of ordered scores  $p_c$  are 0.30, 0.25, 0.20, 0.15, and 0.10, respectively. We claimed a significant agreement if  $\text{Prob}(\rho \leq 0.5 \mid \text{data}) < p_L$ .

|                           | <b>Power (J=18/J=12)</b>     |                              |                              |
|---------------------------|------------------------------|------------------------------|------------------------------|
| <b>Scenarios (I = 40)</b> | <b><math>p_L=0.05</math></b> | <b><math>p_L=0.10</math></b> | <b><math>p_L=0.20</math></b> |
| $\rho = 0.50$             | 0.0/0.0                      | 0.02/0.0                     | 0.02/0.0                     |
| $\rho = 0.67$             | 0.46/0.28                    | 0.54/0.32                    | 0.61/0.41                    |
| $\rho = 0.75$             | 0.87/0.79                    | 0.90/0.79                    | 0.94/0.86                    |
| $\rho = 0.80$             | 0.99/0.95                    | 0.99/0.99                    | 0.99/0.99                    |
| <b>Scenarios (I = 30)</b> | <b><math>p_L=0.05</math></b> | <b><math>p_L=0.10</math></b> | <b><math>p_L=0.20</math></b> |
| $\rho = 0.50$             | 0.0/0.0                      | 0.0/0.0                      | 0.0/0.0                      |
| $\rho = 0.67$             | 0.38/0.35                    | 0.44/0.43                    | 0.52/0.48                    |
| $\rho = 0.75$             | 0.61/0.60                    | 0.69/0.60                    | 0.70/0.70                    |
| $\rho = 0.80$             | 0.82/0.81                    | 0.90/0.84                    | 0.90/0.89                    |
| <b>Scenarios (I = 20)</b> | <b><math>p_L=0.05</math></b> | <b><math>p_L=0.10</math></b> | <b><math>p_L=0.20</math></b> |
| $\rho = 0.50$             | 0.0/0.0                      | 0.0/0.0                      | 0.0/0.0                      |
| $\rho = 0.67$             | 0.14/0.06                    | 0.16/0.07                    | 0.22/0.11                    |
| $\rho = 0.75$             | 0.36/0.31                    | 0.45/0.43                    | 0.50/0.48                    |
| $\rho = 0.80$             | 0.69/0.58                    | 0.71/0.62                    | 0.77/0.67                    |

**Figure 1:** Posterior distribution of ICC for IPSS score agreement based on 26 raters. The posterior mean (SE) of ICC is 0.710 (0.027) with 95% credible interval between 0.651 - 0.759

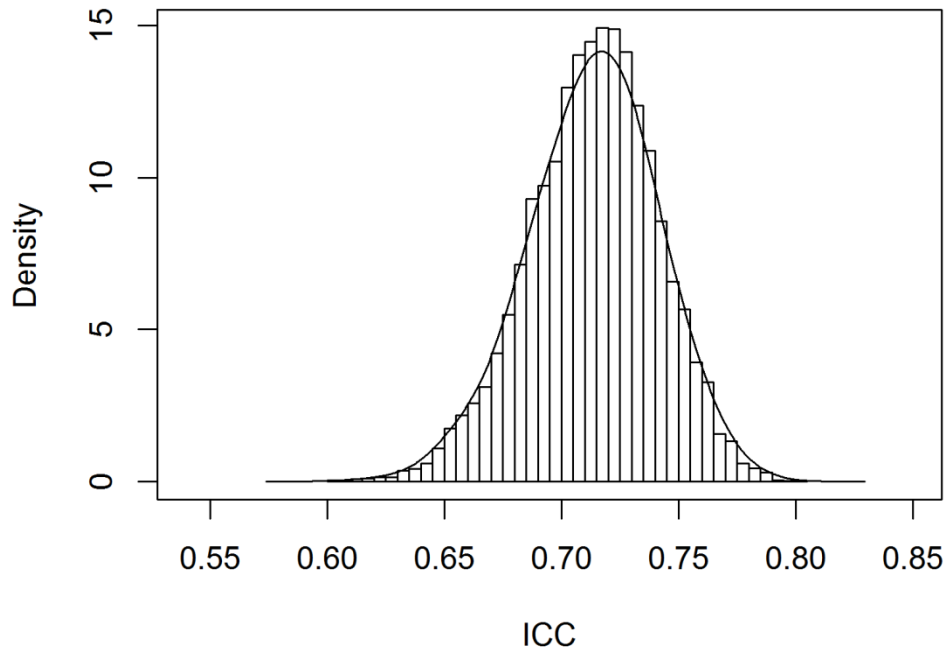

| <b>Supplemental Table 3: ICC for IPSS score for video ratings by demographic characteristics</b> |                               |                |
|--------------------------------------------------------------------------------------------------|-------------------------------|----------------|
| <b>Characteristics</b>                                                                           | <b>Estimated value (s.e.)</b> | <b>95%CI</b>   |
| All raters (n=26)                                                                                | 0.710 (0.027)                 | (0.651, 0.759) |
| Specialty                                                                                        |                               |                |
| Surgeon (n=12)                                                                                   | 0.738 (0.039)                 | (0.654, 0.808) |
| Endoscopist (n=14)                                                                               | 0.684 (0.037)                 | (0.604, 0.751) |
| Gender                                                                                           |                               |                |
| Female (n=6)                                                                                     | 0.778 (0.047)                 | (0.674, 0.858) |
| Male (n=20)                                                                                      | 0.694 (0.032)                 | (0.631, 0.754) |
| No of FAP Patients                                                                               |                               |                |
| 10 or less (n=9)                                                                                 | 0.743 (0.042)                 | (0.653, 0.819) |
| 11 or more (n=17)                                                                                | 0.671 (0.038)                 | (0.594, 0.741) |

\*s.e=Standard Error; CI=Confidence Interval

**Supplemental Table 4 : List of questions asked to the reviewers at the end of the reviews.  
(Please provide your opinion on the following statements)**

| Sr. No | Question                                                                                                                                 | Options           | N (%)   |
|--------|------------------------------------------------------------------------------------------------------------------------------------------|-------------------|---------|
| 1      | The development of a staging system for colorectal polyposis will be helpful in communicating with colleagues regarding patient status   | Strongly Agree    | 18(69)  |
|        |                                                                                                                                          | Agree             | 7(27)   |
|        |                                                                                                                                          | Neutral           | 1(4)    |
|        |                                                                                                                                          | Disagree          | 0       |
|        |                                                                                                                                          | Strongly Disagree | 0       |
| 2      | The development of a staging system for colorectal polyposis will be helpful in evaluating endpoints in clinical chemoprevention trials. | Strongly Agree    | 18(69)  |
|        |                                                                                                                                          | Agree             | 4(15.5) |
|        |                                                                                                                                          | Neutral           | 4(15.5) |
|        |                                                                                                                                          | Disagree          | 0       |
|        |                                                                                                                                          | Strongly Disagree | 0       |
| 3      | Subject to my specific comments in the scoring sheet above, I am in general agreement with the present proposed IPSS                     | Strongly Agree    | 2(8)    |
|        |                                                                                                                                          | Agree             | 21(84)  |
|        |                                                                                                                                          | Neutral           | 1(4)    |
|        |                                                                                                                                          | Disagree          | 1(4)    |
|        |                                                                                                                                          | Strongly Disagree | 0       |
| 4      | Subject to my comments in the scoring sheet above, I am in general agreement with the present proposed interventions by stage.           | Strongly Agree    | 0       |
|        |                                                                                                                                          | Agree             | 16(62)  |
|        |                                                                                                                                          | Neutral           | 8(30)   |
|        |                                                                                                                                          | Disagree          | 2(8)    |
|        |                                                                                                                                          | Strongly Disagree | 0       |

---

**Supplemental Table 5:** Comment by reviewers on outlier cases.

---

ACCEPTED MANUSCRIPT



| Video No | Comments                                                                                                                                                                                                                                                                                                                                                                                                                                                                                                                                                                                                                                                                                                                                                                                                                                                                                                                                                                                                             |
|----------|----------------------------------------------------------------------------------------------------------------------------------------------------------------------------------------------------------------------------------------------------------------------------------------------------------------------------------------------------------------------------------------------------------------------------------------------------------------------------------------------------------------------------------------------------------------------------------------------------------------------------------------------------------------------------------------------------------------------------------------------------------------------------------------------------------------------------------------------------------------------------------------------------------------------------------------------------------------------------------------------------------------------|
| 13       | <p data-bbox="341 327 1374 551">“This one was really difficult - am putting stage 1 because clearly less than 200 polyps. But there are clearly 2 that are &gt;1 cm, so doesn't fit that criteria for stage 1, but does for 2. So it is between Stage 1 and 2. Intervention hard to - this is not someone we would consider surgery for. But would do polypectomies of polyps, particularly larger ones at the time of this colonoscopy, and then repeat colonoscopy in 1 year.” (Comment 1)</p> <p data-bbox="341 595 1374 696">“Don't feel Stage 0 is optimal in this case, as feel total polyp count &lt;20, with a single polyp &gt; 1cm. Perhaps offer an alternative stage category for &lt;20 polyps, 1 or more &gt;1cm, which may better fit this case.” (Comment 2)</p> <p data-bbox="341 741 1374 853">“Tough case. Very few polyps but one in ascending colon needs to be removed, and would be somewhat dicey endoscopically, especially in pt ultimately destined for colectomy anyway” (Comment 3)</p> |
| 20       | <p data-bbox="341 898 1374 1077">“This could be stage 3 too (have difficulty assessing 400 vs 600 etc - by that time it doesn't matter. Saying D because this one is not as severe as some of the others where E is clearly right. But would prefer it this management option was reversed in order. Colectomy, or polypectomy of larger polyps and repeat colonoscopy in 6-12 months if desire to avoid surgery” (Comment 1)</p> <p data-bbox="341 1122 1374 1189">“Re stage, may consider alternative option of 200-500 polyp, no &gt;1cm, which may better fit case.” (Comment 2)</p>                                                                                                                                                                                                                                                                                                                                                                                                                             |
| 24       | <p data-bbox="341 1200 1374 1424">“Is the staging system still applicable to the post-pouch patient? I would biopsy for sure but there is less certainty that polyps are adenomas (although it certainly is possible). I would feel very uncomfortable making any recommendation regarding further management of the pouch (e.g. excision/revision) without histologic information. Suggest that it be pouch polyps be classified separately.” (Comment 1)</p> <p data-bbox="341 1469 1374 1608">“I would want to biopsy that area on retroflexion to confirm adenomatous change (does not appear to be overtly adenomatous, but I wouldn't just ignore it) - and my follow up would depend on that path result - as well as a few small raised areas elsewhere, although these are likely lymphoid aggregates.” (Comment 2)</p>                                                                                                                                                                                     |

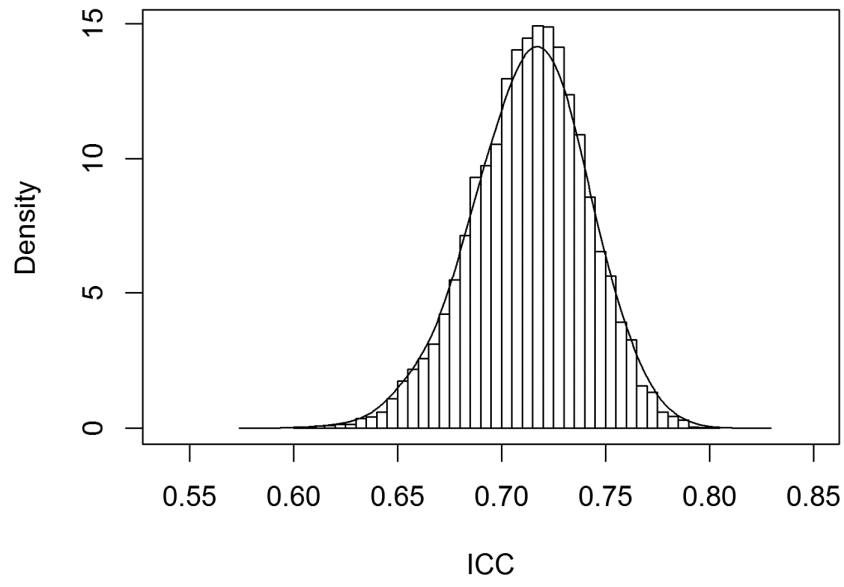

Supplement: NIHMS878056-supplement-supplement_1.pdf [file NIHMS878056-supplement-supplement_1.pdf]
